# Supplementary material for: Transition metal doping boosting paper-based photoelectrochemical immunosensing for neurofilament light chain protein detection
Source: Royal Society of Chemistry journal article supplement (doi:10.1039/d5an01030f), 2025-11-13
Supplement: d5an01030f1.pdf [file d5an01030f1.pdf]

## Electronic supplementary information

### **Transition metal doping boosting paper-based photoelectrochemical immunosensing for neurofilament light chain protein detection**

Cheng-Hua Xu<sup>a,b</sup>, An-Yang Tao<sup>a,b</sup>, Mei-Qing Meng<sup>b</sup>, Xi-Le Zhang<sup>a,b</sup>, Cheng Fang<sup>a,b</sup>, Feng-Zao Chen<sup>a,b,\*</sup>, De-Man Han<sup>b,\*</sup>

<sup>a</sup> Department of Neurology, Taizhou First People's Hospital (Taizhou University Affiliated First People's Hospital), Taizhou University, Zhejiang 318000, P. R. China

<sup>b</sup> Zhejiang Key Laboratory of New Drug Development for Central Nervous System Diseases, Taizhou University, Zhejiang 318000, P. R. China

\* Corresponding authors:

E-mails: chenfengzao@tzc.edu.cn (F.-Z. Chen); hdmztzc@126.com (D.-M. Han)

## TABLE OF CONTENTS

|                                                                                                            |     |
|------------------------------------------------------------------------------------------------------------|-----|
| Experimental Characterization.....                                                                         | S3  |
| Preparation of mAb <sub>1</sub> -Coated Microplate .....                                                   | S3  |
| Preparation of Glucose Oxidase and Detection Antibody-Conjugated Au NP (GOx-Au NP-pAb <sub>2</sub> ) ..... | S3  |
| Figure S1-S2 .....                                                                                         | S4  |
| Figure S3-S4 .....                                                                                         | S5  |
| Figure S5-S6 .....                                                                                         | S6  |
| Figure S7-S8 .....                                                                                         | S7  |
| Figure S9-S10 .....                                                                                        | S8  |
| Figure S11-S12 .....                                                                                       | S9  |
| Table S1 .....                                                                                             | S10 |
| Reference .....                                                                                            | S11 |

**Experimental Characterization.** The confirmation of morphology was obtained under a transmission electron microscope (TEM, FEI Talos F200s). UV-vis absorption spectra were recorded by the Infinite M200 Pro NanoQuant (Tecan, Switzerland).

**Preparation of mAb<sub>1</sub>-Coated Microplate.** Monoclonal antibodies to NEFL were prepared and bonded in microtiter plates as follows. The purchased mAb<sub>1</sub> (50  $\mu$ L per well, 10  $\mu$ g mL<sup>-1</sup>) was added into a high-binding 96-well microplate containing sodium carbonate buffer (0.05 M, pH 9.6), and then incubated 24 h at 4 °C. A plastic film is wrapped over the microplate to prevent evaporation of the liquid. The completed incubated microplates were removed and washed three times with buffer (pH 7.4) containing 0.05% Tween 20 (v/v). This was followed by incubation for 1 h by adding closure buffer (300  $\mu$ L of PBS solution per well (10 mM, pH 7.4) including 1.0 wt % BSA). The aforementioned prepared microtiter plates were prepared for the NEFL assay.

**Preparation of Glucose Oxidase and Detection Antibody-Conjugated Au NP (GOx-Au NP-pAb<sub>2</sub>).** GOx-Au NP-pAb<sub>2</sub> conjugates were prepared according to our previous reports. Firstly, gold colloids (5.0 mL, 5.0 ng mL<sup>-1</sup>) were adjusted to pH 9.5 by using 0.1 M Na<sub>2</sub>CO<sub>3</sub> aqueous solution. Then, 200  $\mu$ L of GOx (0.5 mg mL<sup>-1</sup>) and 50  $\mu$ L of pAb<sub>2</sub> (0.5 mg mL<sup>-1</sup>) were injected into colloidal gold nanoparticles and gently shaken for 60 min at room temperature on a shaker (MS, IKA GmbH, Staufen, Germany). 100  $\mu$ L of polyethylene glycol (1.0 wt %) was added into the suspension and the mixture was further incubated for 12 h at 4 °C. Finally, GOx-Au NP-pAb<sub>2</sub> conjugates were obtained by centrifugation at 4 °C (10 min, 13 000 g), and dispersed in 1.0 mL of 2 mM sodium carbonate solution ( $C_{[\text{Au NP}]} \approx 25 \text{ ng mL}^{-1}$ ) containing 1.0 wt % BSA and 0.1 wt % sodium azide, pH 7.4, and stored at 4 °C for further use.

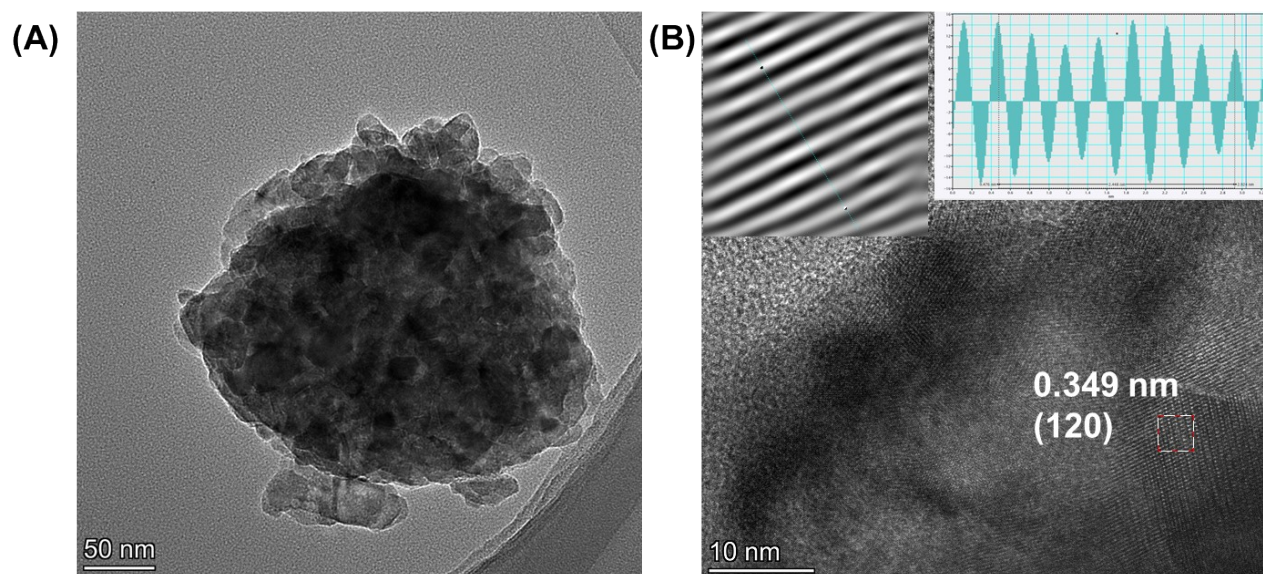

**Figure S1.** (A) TEM image of synthesized self-assembled  $\text{TiO}_2$  nanoparticles and (B) corresponding high-resolution TEM image.

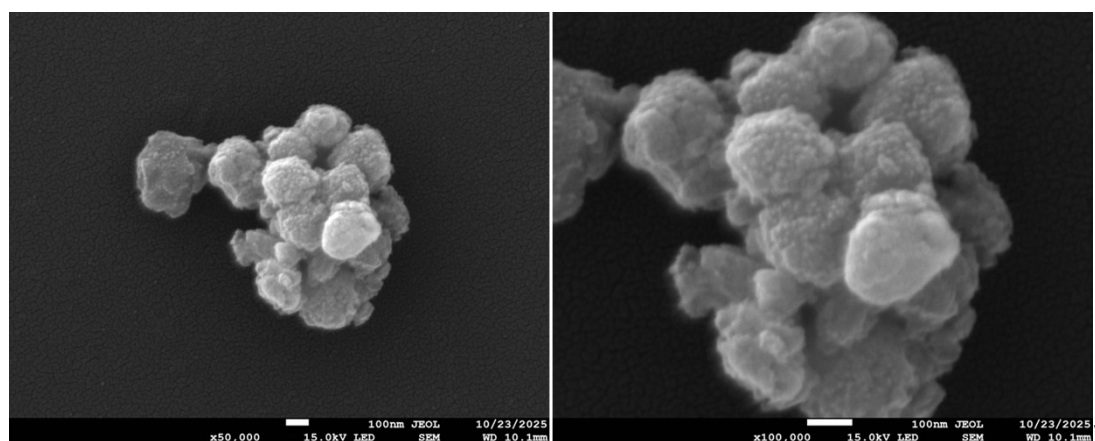

**Figure S2.** SEM image of synthesized self-assembled  $\text{TiO}_2$  nanoparticles and corresponding high-resolution (10000 $\times$ ) SEM image.

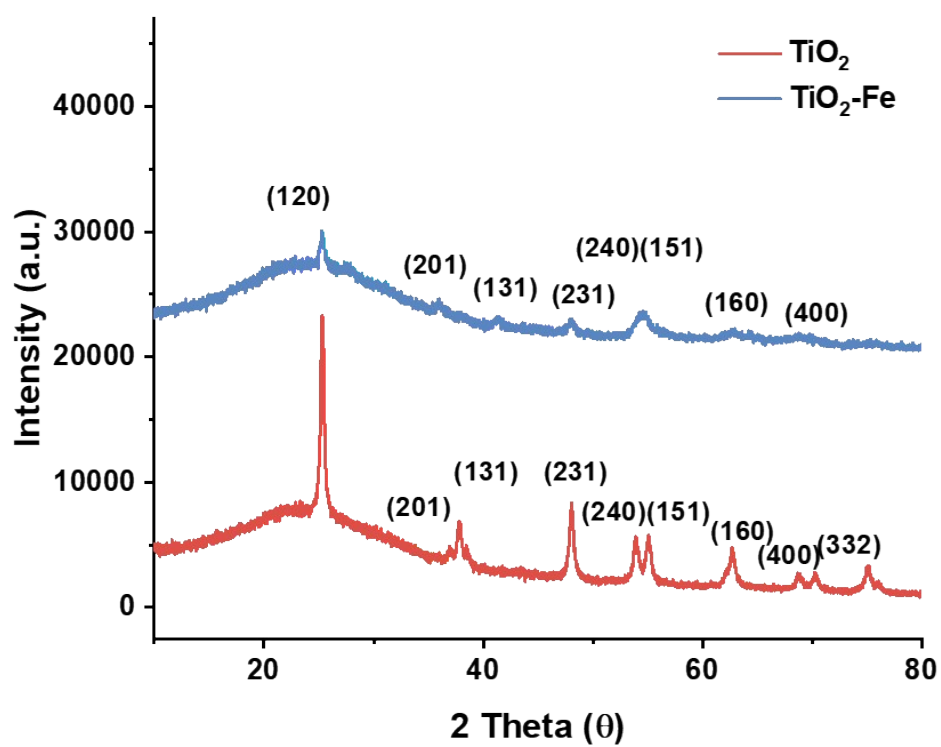

**Figure S3.** XRD patterns of synthesized self-assembled  $\text{TiO}_2$  nanoparticles and  $\text{TiO}_2\text{-Fe}$ .

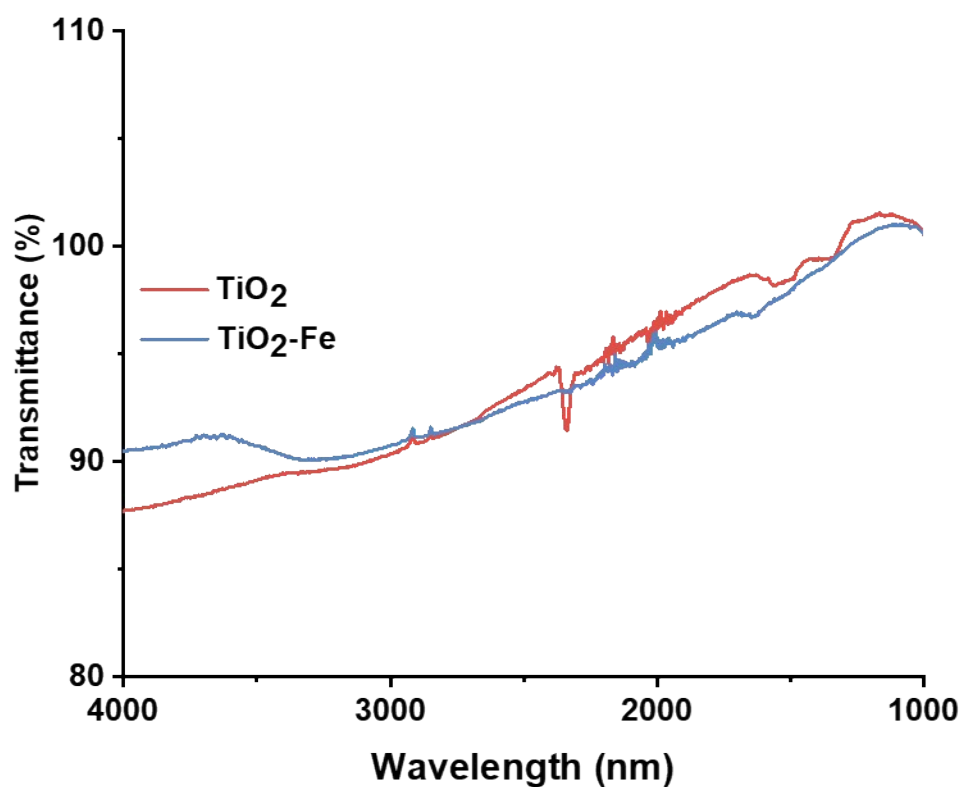

**Figure S4.** FT-IR spectra of synthetically self-assembled  $\text{TiO}_2$  nanoparticles and  $\text{TiO}_2\text{-Fe}$ .

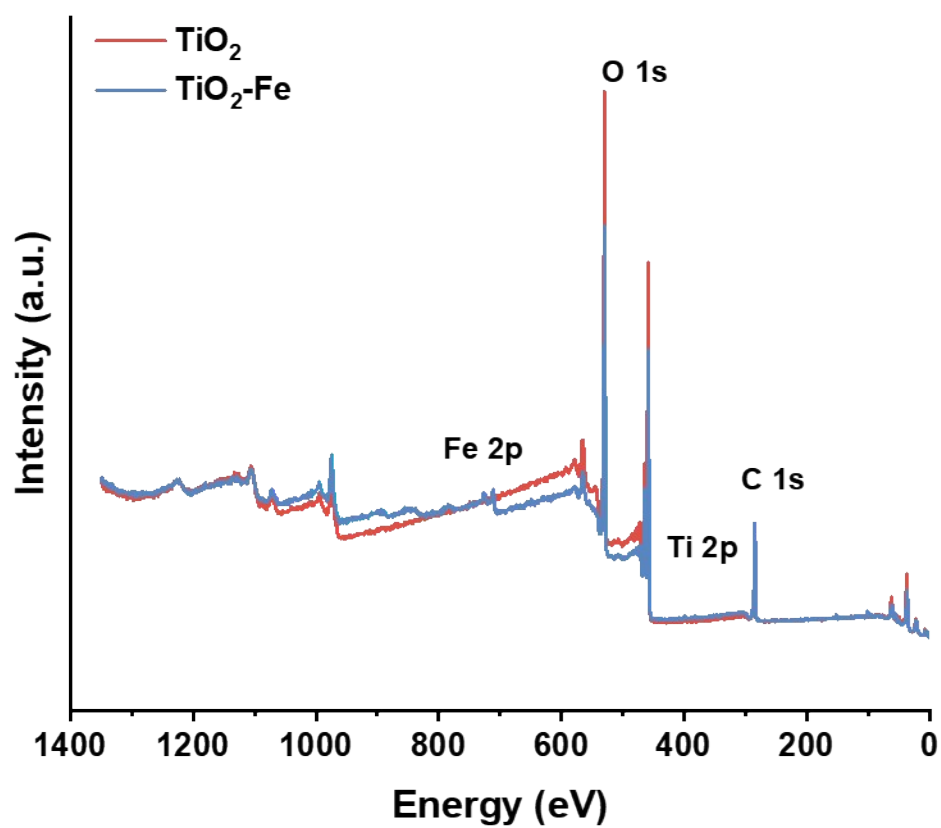

**Figure S5.** XPS spectra of synthesized self-assembled  $\text{TiO}_2$  nanoparticles and  $\text{TiO}_2\text{-Fe}$ .

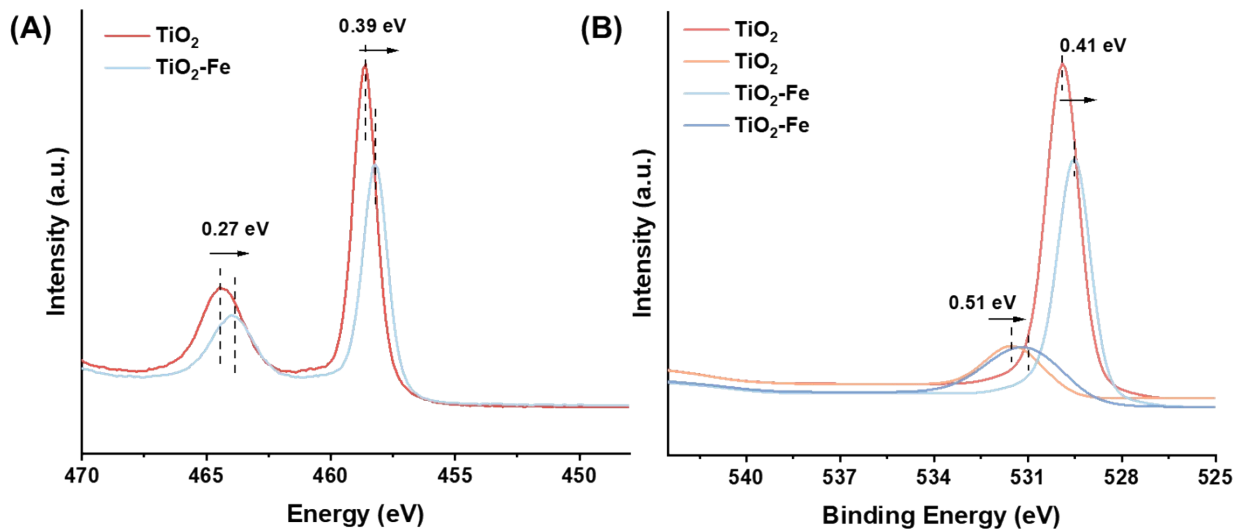

**Figure S6.** High-resolution XPS spectra of (A) Ti and (B) O.

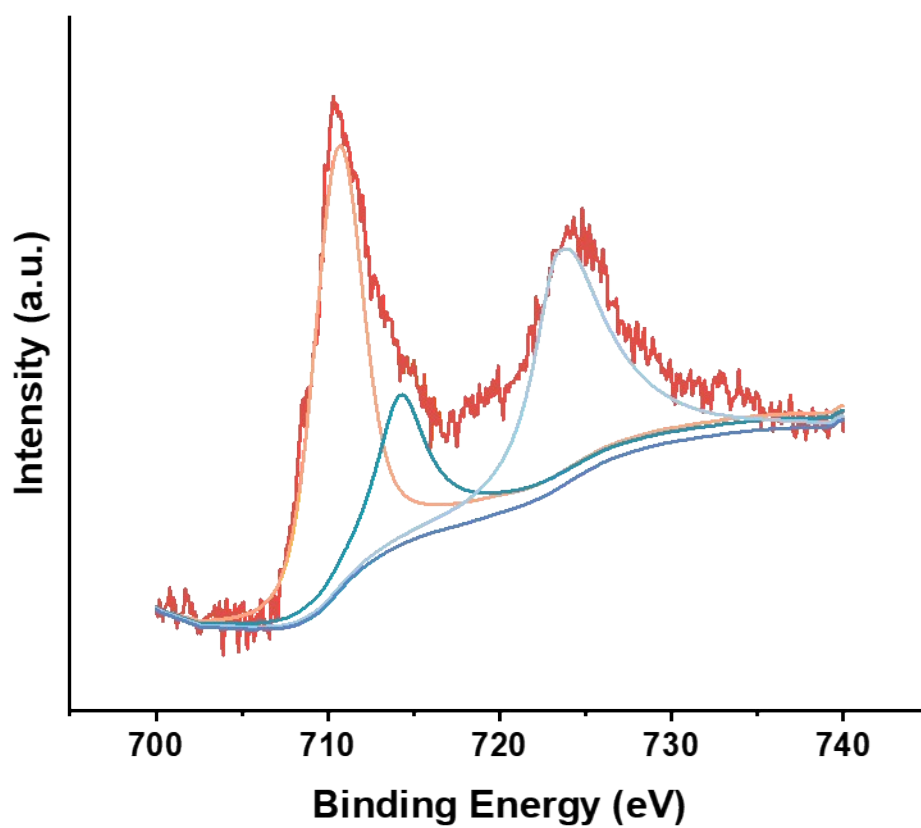

**Figure S7.** High-resolution fine-scale XPS spectra of the Fe 2p orbital.

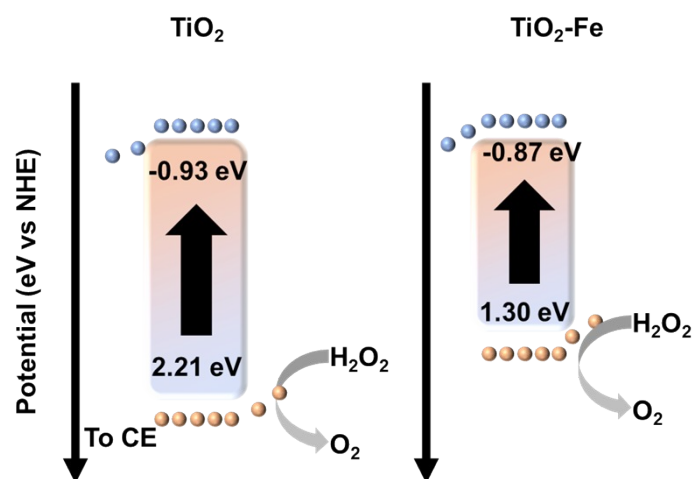

**Figure S8.** Schematic diagram of energy level orbitals for the synthesized photocatalyst.

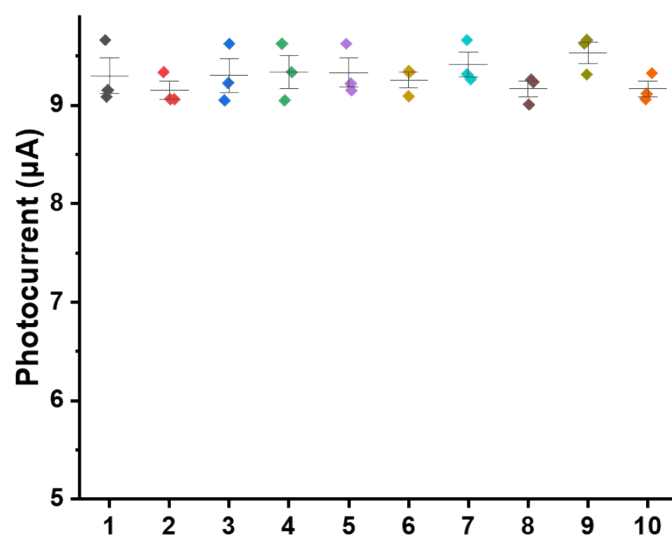

**Figure S9.** Photocurrent stability after repeated bending cycles, measured at the peak photocurrent excitation value.

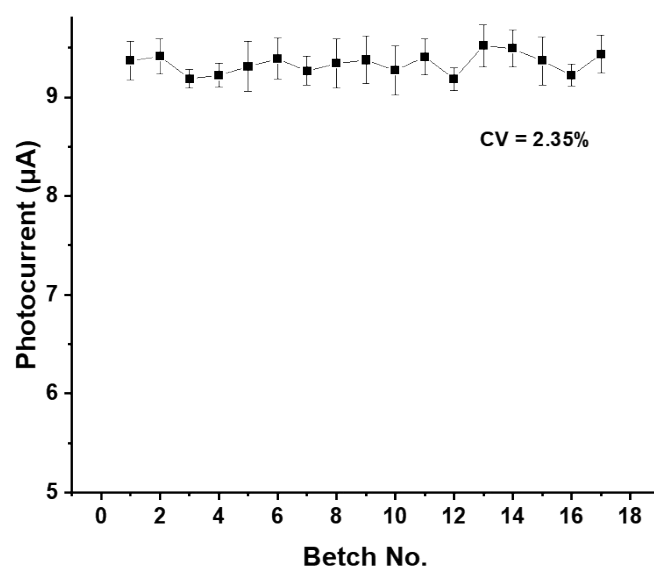

**Figure S10.** Batch-to-batch stability data.



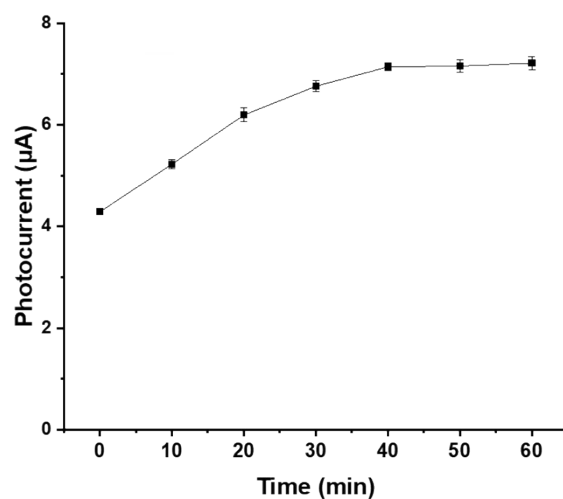

**Figure S11.** Optimized data for enzyme reaction catalysis time, using a 1 ng/mL sample as an example.

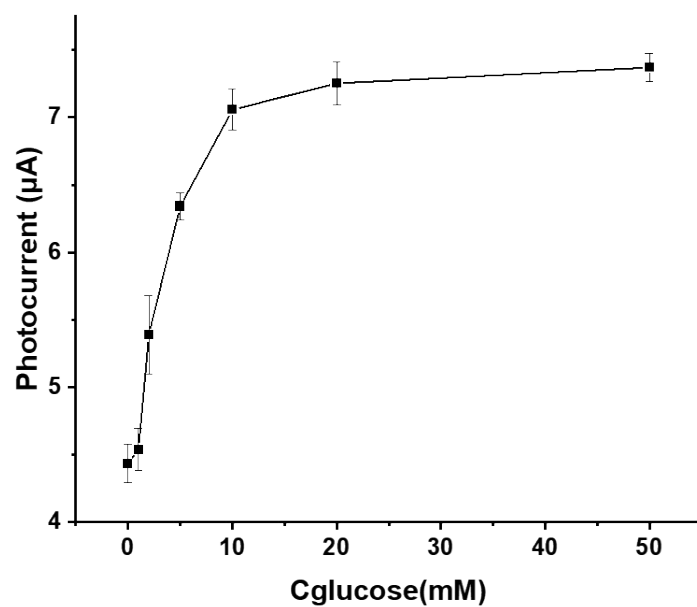

**Figure S12.** Optimization data for enzyme reaction substrate concentration, using a 1 ng/mL sample as an example.

**Table S1.** Comparison table of dynamic response range and LOD values for neurofilament light chain protein detection methods.

| Detection method                  | Dynamic range                   | LOD                       | Ref.      |
|-----------------------------------|---------------------------------|---------------------------|-----------|
| Fluorescent Immunoassay<br>Sensor | 125 - 1500 pM                   | 24 fM                     | 1         |
| ELISA                             | 39 – 5000 pg mL <sup>-1</sup>   | -                         | 2         |
| Electrochemical                   | 5.22 – 1000 pg mL <sup>-1</sup> | 5.22 pg mL <sup>-1</sup>  | 3         |
| Electrochemical                   | 0.01 – 1.5 ng mL <sup>-1</sup>  | 0.01 ng mL <sup>-1</sup>  | 4         |
| Fluorescence                      | 0.05 - 1000 pg mL <sup>-1</sup> | 0.012 pg mL <sup>-1</sup> | 5         |
| Electrochemical                   | 0.01 - 200 ng mL <sup>-1</sup>  | 7 ng mL <sup>-1</sup>     | This work |

## Reference

1. Q. Song, H. Zhang, J. Kong, M. S. Wong and H.-W. Li, *Microchim. Acta*, 2025, **192**, 131.
2. L. Gaetani, K. Höglund, L. Parnetti, F. Pujol-Calderon, B. Becker, P. Eusebi, P. Sarchielli, P. Calabresi, M. Di Filippo, H. Zetterberg and K. Blennow, *Alzheimers Res. Ther.*, 2018, **10**, 8.
3. Z. Huang, L. Zhang, Y. Dou, X. Liu, S. Song, H. Jiang and C. Fan, *Anal. Chem.*, 2024, **96**, 10332-10340.
4. O. Adil and M. H. Shamsi, 2023, **13**, 247.
5. R. Jahani, S. Munusamy, H. Zheng, J. Kong, J. Chen, S. Zhou and X. Guan, *ACS Chemical Neuroscience*, 2025, **16**, 2844-2853.
